# Supplementary material for: Distribution of GABAergic Neurons and VGluT1 and VGAT Immunoreactive Boutons in the Ferret (Mustela putorius) Piriform Cortex and Endopiriform Nucleus. Comparison With Visual Areas 17, 18 and 19
Source: Front Neuroanat. 2019 May 31;13:54. doi: 10.3389/fnana.2019.00054 (PMC6554450; doi:10.3389/fnana.2019.00054)
Supplement: Supplementary file 1 [file Data_Sheet_1.zip › Supplementary Table 1.pdf]

- 1 **Supplementary Table S1.** Sampled area, density and percentage of neurons in the
- 2 piriform cortex (PC) and endopiriform nucleus (EP).

| Sampled area (mm <sup>2</sup> ) |               | Density (neurons/105 µm <sup>2</sup> ) and percentage (in parentheses) |                            |                            |                            |
|---------------------------------|---------------|------------------------------------------------------------------------|----------------------------|----------------------------|----------------------------|
| Anterior                        |               | NeuN-ir                                                                | GAD67-ir                   | CR-ir                      | PV-ir                      |
| PC layer I                      | 0.860 ± 0.067 | 17.0 ± 1.1<br>(4.6 ± 1.0)                                              | 4.8 ± 0.3<br>(9.2 ± 2.4)   | 2.3 ± 0.2<br>(5.7 ± 0.9)   | 4.6 ± 0.3<br>(16.5 ± 1.8)  |
| PC layer II                     | 0.563 ± 0.050 | 265.3 ± 13.3<br>(47.5 ± 4.3)                                           | 13.4 ± 0.7<br>(16.8 ± 1.7) | 20.8 ± 1.0<br>(34.5 ± 3.4) | 10.4 ± 0.5<br>(24.2 ± 5.5) |
| PC layer III                    | 1.158 ± 0.093 | 74.7 ± 7.0<br>(27.5 ± 3.4)                                             | 21.3 ± 2.0<br>(54.9 ± 4.0) | 10.8 ± 1.0<br>(36.8 ± 4.9) | 10.1 ± 0.9<br>(48.4 ± 6.4) |
| PC all layers                   | 2.582 ± 0.124 | 97.1 ± 12.1<br>(79.7 ± 5.9)                                            | 14.1 ± 1.8<br>(80.9 ± 7.1) | 10.1 ± 1.3<br>(77.0 ± 9.6) | 8.3 ± 1.0<br>(89.1 ± 9.1)  |
| EP                              | 0.367 ± 0.018 | 174.1 ± 3.2<br>(20.3 ± 2.4)                                            | 23.4 ± 0.4<br>(19.1 ± 2.5) | 21.3 ± 0.4<br>(23.0 ± 5.0) | 7.2 ± 0.1<br>(10.9 ± 2.3)  |
| PC+EP                           | 2.949 ± 0.117 | 106.6 ± 12.5<br>(100)                                                  | 15.2 ± 1.8<br>(100)        | 11.5 ± 1.3<br>(100)        | 8.2 ± 1.0<br>(100)         |
| Posterior                       |               |                                                                        |                            |                            |                            |
| PC layer I                      | 1.315 ± 0.210 | 6.4 ± 0.5<br>(1.9 ± 0.6)                                               | 4.8 ± 0.1<br>(9.9 ± 0.8)   | 1.9 ± 0.0<br>(5.4 ± 1.8)   | 3.0 ± 0.1<br>(15.0 ± 2.0)  |
| PC layer II                     | 0.783 ± 0.066 | 218.4 ± 10.3<br>(39.5 ± 4.2)                                           | 13.5 ± 0.9<br>(16.5 ± 1.6) | 20.5 ± 1.9<br>(34.4 ± 4.1) | 7.2 ± 0.7<br>(21.5 ± 2.0)  |
| PC layer III                    | 1.615 ± 0.255 | 92.3 ± 9.6<br>(34.4 ± 4.5)                                             | 22.1 ± 3.6<br>(55.8 ± 3.6) | 11.3 ± 1.0<br>(39.1 ± 3.0) | 7.5 ± 0.9<br>(46.2 ± 5.6)  |
| PC all layers                   | 3.712 ± 0.311 | 88.5 ± 11.5<br>(75.8 ± 9.9)                                            | 14.1 ± 2.5<br>(82.2 ± 4.5) | 9.9 ± 1.7<br>(78.9 ± 6.4)  | 5.8 ± 0.8<br>(82.6 ± 6.5)  |
| EP                              | 0.367 ± 0.018 | 285.2 ± 9.2<br>(24.2 ± 4.4)                                            | 30.9 ± 1.6<br>(17.8 ± 1.8) | 26.7 ± 2.5<br>(21.1 ± 2.9) | 12.4 ± 0.2<br>(17.4 ± 4.7) |
| PC+EP                           | 4.079 ± 0.311 | 106.1 ± 9.9<br>(100)                                                   | 15.7 ± 2.9<br>(100)        | 11.4 ± 2.2<br>(100)        | 6.4 ± 1.0<br>(100)         |

- 3 Data are mean ± SD.
