# Supplementary material for: Distribution of GABAergic Neurons and VGluT1 and VGAT Immunoreactive Boutons in the Ferret (Mustela putorius) Piriform Cortex and Endopiriform Nucleus. Comparison With Visual Areas 17, 18 and 19
Source: Front Neuroanat. 2019 May 31;13:54. doi: 10.3389/fnana.2019.00054 (PMC6554450; doi:10.3389/fnana.2019.00054)
Supplement: Supplementary file 1 [file Data_Sheet_1.zip › Supplementary Table 2.pdf]

1 **Supplementary Table S2.** Sampled area, density and percentage of neurons in visual  
2 areas 17, 18 and 19.

| Sampled area (mm <sup>2</sup> ) |               | Density (neurons/10 <sup>5</sup> μm <sup>2</sup> ) and percentage (in parentheses) |                             |                             |                            |
|---------------------------------|---------------|------------------------------------------------------------------------------------|-----------------------------|-----------------------------|----------------------------|
| Area 17                         |               | NeuN-ir                                                                            | GAD67-ir                    | CR-ir                       | PV-ir                      |
| I                               | 0.097 ± 0.004 | 37.4 ± 14.2<br>(2.5 ± 0.9)                                                         | 2.2 ± 0.8<br>(0.5 ± 0.1)    | 2.0 ± 0.6<br>(0.9 ± 0.4)    | 1.7 ± 0.6<br>(0.6 ± 0.6)   |
| II                              | 0.116 ± 0.005 | 173.1 ± 40.0<br>(13.7 ± 1.3)                                                       | 57.7 ± 18.5<br>(14.7 ± 1.2) | 61.5 ± 19.0<br>(32.9 ± 2.3) | 30.7 ± 5.6<br>(13.6 ± 1.6) |
| III                             | 0.319 ± 0.013 | 125.3 ± 28.8<br>(27.3 ± 3.3)                                                       | 43.5 ± 10.2<br>(30.4 ± 3.3) | 26.0 ± 8.0<br>(38.2 ± 3.0)  | 20.0 ± 4.5<br>(24.4 ± 2.3) |
| IV                              | 0.235 ± 0.010 | 173.0 ± 40.1<br>(27.7 ± 2.8)                                                       | 52.1 ± 15.5<br>(26.8 ± 3.2) | 16.6 ± 4.6<br>(17.9 ± 1.9)  | 38.7 ± 8.7<br>(37.4 ± 3.1) |
| V                               | 0.140 ± 0.006 | 120.2 ± 31.4<br>(11.5 ± 1.9)                                                       | 43.5 ± 16.5<br>(13.4 ± 2.4) | 9.3 ± 2.1<br>(6.0 ± 0.6)    | 26.1 ± 7.1<br>(14.0 ± 2.0) |
| VI                              | 0.134 ± 0.006 | 189.6 ± 34.6<br>(17.3 ± 1.7)                                                       | 48.7 ± 18.5<br>(14.3 ± 0.6) | 6.6 ± 1.0<br>(4.0 ± 0.4)    | 28.4 ± 6.4<br>(12.7 ± 1.2) |
| Area 18                         |               |                                                                                    |                             |                             |                            |
| I                               | 0.149 ± 0.014 | 8.1 ± 1.4<br>(0.8 ± 0.1)                                                           | 1.8 ± 0.3<br>(0.6 ± 0.1)    | 0.7 ± 0.1<br>(0.4 ± 0.4)    | 1.8 ± 0.3<br>(1.2 ± 0.1)   |
| II                              | 0.122 ± 0.011 | 177.7 ± 30.3<br>(14.1 ± 0.9)                                                       | 55.2 ± 9.4<br>(14.9 ± 0.9)  | 61.3 ± 10.4<br>(33.5 ± 3.5) | 27.7 ± 4.7<br>(14.9 ± 0.8) |
| III                             | 0.418 ± 0.039 | 109.0 ± 18.6<br>(29.7 ± 1.2)                                                       | 31.0 ± 5.3<br>(28.7 ± 2.4)  | 20.8 ± 3.5<br>(39.2 ± 3.7)  | 15.4 ± 2.6<br>(28.4 ± 1.9) |
| IV                              | 0.208 ± 0.019 | 139.3 ± 23.7<br>(18.9 ± 1.8)                                                       | 46.2 ± 7.9<br>(19.2 ± 2.9)  | 16.4 ± 2.5<br>(13.7 ± 1.5)  | 15.7 ± 2.7<br>(14.4 ± 0.8) |
| V                               | 0.173 ± 0.016 | 107.2 ± 18.2<br>(12.1 ± 1.1)                                                       | 39.4 ± 6.7<br>(17.2 ± 1.2)  | 9.9 ± 1.7<br>(7.7 ± 1.5)    | 22.3 ± 3.8<br>(17.1 ± 1.1) |
| VI                              | 0.219 ± 0.020 | 170.7 ± 29.1<br>(24.4 ± 2.0)                                                       | 40.0 ± 6.8<br>(19.4 ± 2.0)  | 5.6 ± 0.9<br>(5.5 ± 1.0)    | 24.9 ± 4.2<br>(24.0 ± 0.9) |
| Area 19                         |               |                                                                                    |                             |                             |                            |
| I                               | 0.225 ± 0.016 | 6.7 ± 1.1<br>(1.1 ± 0.4)                                                           | 1.0 ± 0.2<br>(0.7 ± 0.2)    | 1.2 ± 0.2<br>(1.4 ± 1.1)    | 1.3 ± 0.2<br>(1.5 ± 1.4)   |
| II                              | 0.168 ± 0.012 | 101.4 ± 17.3<br>(12.3 ± 0.9)                                                       | 28.6 ± 5.2<br>(14.1 ± 0.9)  | 33.6 ± 5.9<br>(33.8 ± 3.1)  | 14.5 ± 2.6<br>(12.5 ± 2.1) |
| III                             | 0.503 ± 0.035 | 78.5 ± 13.4<br>(28.5 ± 2.9)                                                        | 19.8 ± 3.6<br>(29.2 ± 3.5)  | 16.5 ± 2.9<br>(37.1 ± 3.2)  | 10.5 ± 1.9<br>(27.2 ± 3.1) |
| IV                              | 0.184 ± 0.013 | 140.0 ± 23.8<br>(18.7 ± 1.9)                                                       | 36.0 ± 6.5<br>(19.5 ± 2.9)  | 15.8 ± 2.8<br>(15.0 ± 1.7)  | 15.9 ± 2.3<br>(15.1 ± 1.7) |
| V                               | 0.117 ± 0.008 | 160.5 ± 27.3<br>(13.6 ± 1.9)                                                       | 48.4 ± 8.7<br>(16.6 ± 2.1)  | 12.3 ± 2.2<br>(7.4 ± 1.6)   | 29.6 ± 5.2<br>(17.9 ± 1.7) |
| VI                              | 0.257 ± 0.018 | 138.7 ± 23.6<br>(25.8 ± 3.1)                                                       | 26.3 ± 4.8<br>(19.9 ± 2.3)  | 3.8 ± 0.7<br>(5.0 ± 1.0)    | 19.5 ± 3.4<br>(25.9 ± 2.4) |

3 Data are mean ± SD.
