# Supplementary material for: Distribution of GABAergic Neurons and VGluT1 and VGAT Immunoreactive Boutons in the Ferret (Mustela putorius) Piriform Cortex and Endopiriform Nucleus. Comparison With Visual Areas 17, 18 and 19
Source: Front Neuroanat. 2019 May 31;13:54. doi: 10.3389/fnana.2019.00054 (PMC6554450; doi:10.3389/fnana.2019.00054)
Supplement: Supplementary file 1 [file Data_Sheet_1.zip › Supplementary Table 3.pdf]

**Supplementary Table S3.** Sampled area, and density, percentage, proportion, ratio, area and circularity of VGluT1-ir and VGAT-ir boutons in the piriform cortex (PC) and endopiriform nucleus (EP).

| VGluT1-ir boutons                                                           |                                |                                |                                | VGAT-ir boutons                |                                |                                |
|-----------------------------------------------------------------------------|--------------------------------|--------------------------------|--------------------------------|--------------------------------|--------------------------------|--------------------------------|
|                                                                             | Anterior                       | Posterior                      | Total                          | Anterior                       | Posterior                      | Total                          |
| <b>Sampled area (mm<sup>2</sup>)</b>                                        |                                |                                |                                |                                |                                |                                |
| PC layer I                                                                  |                                |                                |                                | 1.39 ± 0.064                   | 1.86 ± 0.073                   | 1.62 ± 0.066                   |
| PC layer II                                                                 |                                |                                |                                | 0.87 ± 0.035                   | 1.22 ± 0.052                   | 1.04 ± 0.042                   |
| PC layer III                                                                |                                |                                |                                | 1.77 ± 0.038                   | 2.50 ± 0.074                   | 2.14 ± 0.087                   |
| EP                                                                          |                                |                                |                                | 0.63 ± 0.018                   | 1.11 ± 0.027                   | 0.87 ± 0.035                   |
| PC+EP                                                                       |                                |                                |                                | 4.65 ± 0.137                   | 6.69 ± 0.276                   | 5.67 ± 0.230                   |
| <b>Density (boutons/10<sup>3</sup> μm<sup>2</sup>)</b>                      |                                |                                |                                |                                |                                |                                |
| PC layer I                                                                  | 282.6 ± 41.4                   | 266.2 ± 31.1                   | 273.2 ± 35.7                   | 85.0 ± 11.7                    | 88.1 ± 8.5                     | 86.8 ± 9.8                     |
| PC layer II                                                                 | 233.3 ± 33.7                   | 242.2 ± 25.5                   | 238.5 ± 29.3                   | 74.9 ± 8.9                     | 78.7 ± 7.1                     | 77.2 ± 8.0                     |
| PC layer III                                                                | 213.0 ± 45.7                   | 242.7 ± 20.0                   | 230.4 ± 37.7                   | 76.3 ± 17.4                    | 75.7 ± 5.4                     | 75.9 ± 11.8                    |
| EP                                                                          | 270.9 ± 20.8                   | 271.3 ± 58.1                   | 271.1 ± 47.0                   | 80.8 ± 9.5                     | 80.8 ± 4.9                     | 80.8 ± 6.7                     |
| PC+EP                                                                       | 256.9 ± 30.5                   | 255.6 ± 33.7                   | 250.4 ± 37.7                   | 79.8 ± 11.1                    | 80.8 ± 6.5                     | 80.0 ± 10.2                    |
| <b>Bouton percentage</b>                                                    |                                |                                |                                |                                |                                |                                |
| PC layer I                                                                  | 34.4 ± 4.0                     | 29.1 ± 1.9                     | 31.8 ± 3.0                     | 32.0 ± 4.0                     | 30.4 ± 1.9                     | 31.2 ± 3.0                     |
| PC layer II                                                                 | 17.7 ± 3.5                     | 17.4 ± 1.8                     | 17.5 ± 2.6                     | 17.6 ± 3.5                     | 17.8 ± 1.8                     | 17.7 ± 2.6                     |
| PC layer III                                                                | 33.1 ± 2.9                     | 35.8 ± 1.9                     | 34.4 ± 2.4                     | 36.7 ± 2.9                     | 35.2 ± 1.9                     | 35.9 ± 2.4                     |
| EP                                                                          | 14.8 ± 2.1                     | 17.7 ± 3.3                     | 16.3 ± 2.7                     | 13.7 ± 2.1                     | 16.6 ± 3.3                     | 15.2 ± 2.7                     |
| PC+EP                                                                       | 100                            | 100                            | 100                            | 100                            | 100                            | 100                            |
| <b>Bouton proportion (%) in each layer (VGluT1-ir/VGAT-ir bouton ratio)</b> |                                |                                |                                |                                |                                |                                |
| PC layer I                                                                  |                                |                                |                                | 23.4 ± 4.0<br>(3.4)            | 25.0 ± 1.9<br>(3.0)            | 24.3 ± 3.0<br>(3.2)            |
| PC layer II                                                                 |                                |                                |                                | 24.5 ± 3.5<br>(3.2)            | 24.6 ± 1.8<br>(3.1)            | 24.6 ± 2.6<br>(3.1)            |
| PC layer III                                                                |                                |                                |                                | 26.5 ± 2.9<br>(2.8)            | 23.8 ± 1.9<br>(3.2)            | 25.2 ± 3.0<br>(3.0)            |
| EP                                                                          |                                |                                |                                | 23.0 ± 2.1<br>(3.4)            | 23.4 ± 3.3<br>(3.4)            | 23.2 ± 2.8<br>(3.4)            |
| PC+EP                                                                       |                                |                                |                                | 23.9 ± 2.8<br>(3.3)            | 24.2 ± 2.2<br>(3.2)            | 24.4 ± 2.7<br>(3.2)            |
| <b>Bouton area (μm<sup>2</sup>) and circularity (between parenthesis)</b>   |                                |                                |                                |                                |                                |                                |
| PC layer I                                                                  | 0.214 ± 0.036<br>(0.88 ± 0.02) | 0.213 ± 0.021<br>(0.91 ± 0.01) | 0.213 ± 0.027<br>(0.90 ± 0.02) | 0.264 ± 0.045<br>(0.64 ± 0.04) | 0.259 ± 0.024<br>(0.66 ± 0.02) | 0.261 ± 0.033<br>(0.65 ± 0.03) |
| PC layer II                                                                 | 0.214 ± 0.029<br>(0.89 ± 0.01) | 0.210 ± 0.018<br>(0.88 ± 0.01) | 0.212 ± 0.023<br>(0.89 ± 0.02) | 0.311 ± 0.026<br>(0.62 ± 0.02) | 0.295 ± 0.031<br>(0.63 ± 0.02) | 0.302 ± 0.029<br>(0.63 ± 0.02) |
| PC layer III                                                                | 0.213 ± 0.015<br>(0.90 ± 0.01) | 0.188 ± 0.016<br>(0.90 ± 0.01) | 0.201 ± 0.023<br>(0.90 ± 0.02) | 0.301 ± 0.051<br>(0.61 ± 0.05) | 0.303 ± 0.025<br>(0.65 ± 0.01) | 0.302 ± 0.039<br>(0.63 ± 0.03) |
| EP                                                                          | 0.189 ± 0.021<br>(0.91 ± 0.01) | 0.174 ± 0.028<br>(0.91 ± 0.01) | 0.180 ± 0.026<br>(0.91 ± 0.02) | 0.278 ± 0.038<br>(0.63 ± 0.02) | 0.261 ± 0.025<br>(0.63 ± 0.01) | 0.267 ± 0.031<br>(0.63 ± 0.03) |
| PC+EP                                                                       | 0.201 ± 0.024<br>(0.89 ± 0.01) | 0.196 ± 0.021<br>(0.09 ± 0.01) | 0.203 ± 0.025<br>(0.89 ± 0.02) | 0.285 ± 0.039<br>(0.62 ± 0.04) | 0.280 ± 0.026<br>(0.65 ± 0.02) | 0.285 ± 0.036<br>(0.64 ± 0.04) |

Data are mean ± SD.
