# Supplementary material for: Distribution of GABAergic Neurons and VGluT1 and VGAT Immunoreactive Boutons in the Ferret (Mustela putorius) Piriform Cortex and Endopiriform Nucleus. Comparison With Visual Areas 17, 18 and 19
Source: Front Neuroanat. 2019 May 31;13:54. doi: 10.3389/fnana.2019.00054 (PMC6554450; doi:10.3389/fnana.2019.00054)
Supplement: Supplementary file 1 [file Data_Sheet_1.zip › Supplementary Table 4.pdf]

1 **Supplementary Table S4.** Sampled area, and density, percentage, proportion, ratio,  
2 area and circularity of VGluT1-ir and VGAT-ir boutons in visual areas 17, 18 and 19.

| VGluT1-ir boutons                                                                     |                                        |                                        |                                        | VGAT-ir boutons                        |                                        |                                        |
|---------------------------------------------------------------------------------------|----------------------------------------|----------------------------------------|----------------------------------------|----------------------------------------|----------------------------------------|----------------------------------------|
|                                                                                       | Area 17                                | Area 18                                | Area 19                                | Area 17                                | Area 18                                | Area 19                                |
| <b>Sampled area (<math>\times 10^5 \mu\text{m}^2</math>)</b>                          |                                        |                                        |                                        |                                        |                                        |                                        |
| I                                                                                     |                                        |                                        |                                        | 1.03 $\pm$ 0.021                       | 1.57 $\pm$ 0.032                       | 2.37 $\pm$ 0.049                       |
| II                                                                                    |                                        |                                        |                                        | 1.24 $\pm$ 0.026                       | 1.28 $\pm$ 0.026                       | 1.77 $\pm$ 0.037                       |
| III                                                                                   |                                        |                                        |                                        | 3.41 $\pm$ 0.070                       | 4.39 $\pm$ 0.061                       | 5.30 $\pm$ 0.079                       |
| IV                                                                                    |                                        |                                        |                                        | 2.50 $\pm$ 0.052                       | 2.19 $\pm$ 0.045                       | 1.95 $\pm$ 0.040                       |
| V                                                                                     |                                        |                                        |                                        | 1.50 $\pm$ 0.031                       | 1.82 $\pm$ 0.038                       | 1.24 $\pm$ 0.025                       |
| VI                                                                                    |                                        |                                        |                                        | 1.43 $\pm$ 0.029                       | 2.30 $\pm$ 0.047                       | 2.72 $\pm$ 0.056                       |
| <b>Density (boutons/<math>10^3 \mu\text{m}^2</math>)</b>                              |                                        |                                        |                                        |                                        |                                        |                                        |
| I                                                                                     | 291.8 $\pm$ 38.7                       | 290.9 $\pm$ 16.7                       | 327.6 $\pm$ 32.1                       | 121.7 $\pm$ 7.3                        | 112.6 $\pm$ 5.8                        | 135.8 $\pm$ 10.3                       |
| II                                                                                    | 274.8 $\pm$ 32.4                       | 275.8 $\pm$ 32.7                       | 265.0 $\pm$ 13.1                       | 111.8 $\pm$ 4.6                        | 100.6 $\pm$ 5.0                        | 101.8 $\pm$ 4.5                        |
| III                                                                                   | 261.6 $\pm$ 35.4                       | 250.2 $\pm$ 27.9                       | 258.6 $\pm$ 22.4                       | 103.3 $\pm$ 9.9                        | 91.0 $\pm$ 5.2                         | 94.0 $\pm$ 4.2                         |
| IV                                                                                    | 254.9 $\pm$ 32.1                       | 243.7 $\pm$ 23.1                       | 231.4 $\pm$ 10.7                       | 96.1 $\pm$ 9.6                         | 83.9 $\pm$ 6.4                         | 79.6 $\pm$ 6.3                         |
| V                                                                                     | 212.5 $\pm$ 43.9                       | 211.5 $\pm$ 15.9                       | 211.3 $\pm$ 22.1                       | 87.7 $\pm$ 4.4                         | 79.1 $\pm$ 4.3                         | 78.2 $\pm$ 7.2                         |
| VI                                                                                    | 228.8 $\pm$ 27.6                       | 220.5 $\pm$ 14.4                       | 209.2 $\pm$ 25.2                       | 95.1 $\pm$ 4.8                         | 84.0 $\pm$ 4.8                         | 75.1 $\pm$ 11.0                        |
| <b>Bouton percentage</b>                                                              |                                        |                                        |                                        |                                        |                                        |                                        |
| I                                                                                     | 10.7 $\pm$ 0.9                         | 13.8 $\pm$ 0.4                         | 19.9 $\pm$ 1.3                         | 11.2 $\pm$ 0.4                         | 14.4 $\pm$ 0.3                         | 22.1 $\pm$ 1.1                         |
| II                                                                                    | 12.1 $\pm$ 1.4                         | 10.0 $\pm$ 2.0                         | 12.1 $\pm$ 0.8                         | 12.4 $\pm$ 0.5                         | 10.5 $\pm$ 0.8                         | 12.4 $\pm$ 0.7                         |
| III                                                                                   | 31.7 $\pm$ 3.8                         | 33.2 $\pm$ 4.4                         | 35.2 $\pm$ 3.4                         | 31.3 $\pm$ 2.7                         | 32.6 $\pm$ 2.1                         | 34.2 $\pm$ 1.6                         |
| IV                                                                                    | 22.7 $\pm$ 3.3                         | 16.1 $\pm$ 1.6                         | 11.6 $\pm$ 0.8                         | 21.4 $\pm$ 2.5                         | 15.0 $\pm$ 1.1                         | 10.6 $\pm$ 1.2                         |
| V                                                                                     | 11.3 $\pm$ 2.3                         | 11.6 $\pm$ 1.1                         | 6.7 $\pm$ 1.8                          | 11.7 $\pm$ 0.6                         | 11.8 $\pm$ 0.8                         | 6.6 $\pm$ 1.4                          |
| VI                                                                                    | 11.6 $\pm$ 1.8                         | 15.3 $\pm$ 1.5                         | 14.6 $\pm$ 3.3                         | 12.1 $\pm$ 0.8                         | 15.8 $\pm$ 1.2                         | 14.0 $\pm$ 3.7                         |
| <b>Bouton proportion (%) in each layer (VGluT1-ir/VGAT-ir bouton ratio)</b>           |                                        |                                        |                                        |                                        |                                        |                                        |
| I                                                                                     |                                        |                                        |                                        | 29.4 $\pm$ 2.2<br>(2.4)                | 27.9 $\pm$ 1.2<br>(2.6)                | 29.3 $\pm$ 1.6<br>(2.4)                |
| II                                                                                    |                                        |                                        |                                        | 28.9 $\pm$ 2.4<br>(2.5)                | 28.1 $\pm$ 2.6<br>(2.6)                | 27.8 $\pm$ 1.0<br>(2.6)                |
| III                                                                                   |                                        |                                        |                                        | 28.3 $\pm$ 3.9<br>(2.5)                | 26.7 $\pm$ 2.8<br>(2.7)                | 26.7 $\pm$ 1.4<br>(2.8)                |
| IV                                                                                    |                                        |                                        |                                        | 27.4 $\pm$ 3.4<br>(2.7)                | 25.6 $\pm$ 1.7<br>(2.9)                | 25.6 $\pm$ 1.1<br>(2.9)                |
| V                                                                                     |                                        |                                        |                                        | 29.2 $\pm$ 4.3<br>(2.4)                | 27.2 $\pm$ 1.7<br>(2.7)                | 27.0 $\pm$ 0.8<br>(2.7)                |
| VI                                                                                    |                                        |                                        |                                        | 29.4 $\pm$ 2.3<br>(2.4)                | 27.6 $\pm$ 0.8<br>(2.6)                | 26.4 $\pm$ 3.5<br>(2.8)                |
| <b>Bouton area (<math>\mu\text{m}^2</math>) and circularity (between parenthesis)</b> |                                        |                                        |                                        |                                        |                                        |                                        |
| I                                                                                     | 0.219 $\pm$ 0.030<br>(0.90 $\pm$ 0.01) | 0.215 $\pm$ 0.017<br>(0.91 $\pm$ 0.01) | 0.186 $\pm$ 0.014<br>(0.90 $\pm$ 0.01) | 0.270 $\pm$ 0.013<br>(0.67 $\pm$ 0.04) | 0.267 $\pm$ 0.015<br>(0.69 $\pm$ 0.01) | 0.252 $\pm$ 0.009<br>(0.66 $\pm$ 0.01) |
| II                                                                                    | 0.224 $\pm$ 0.042<br>(0.90 $\pm$ 0.01) | 0.217 $\pm$ 0.019<br>(0.90 $\pm$ 0.01) | 0.202 $\pm$ 0.013<br>(0.89 $\pm$ 0.01) | 0.348 $\pm$ 0.033<br>(0.66 $\pm$ 0.02) | 0.335 $\pm$ 0.015<br>(0.66 $\pm$ 0.02) | 0.319 $\pm$ 0.009<br>(0.63 $\pm$ 0.01) |
| III                                                                                   | 0.204 $\pm$ 0.028<br>(0.89 $\pm$ 0.01) | 0.225 $\pm$ 0.022<br>(0.90 $\pm$ 0.01) | 0.219 $\pm$ 0.010<br>(0.90 $\pm$ 0.01) | 0.361 $\pm$ 0.028<br>(0.66 $\pm$ 0.02) | 0.366 $\pm$ 0.021<br>(0.65 $\pm$ 0.02) | 0.339 $\pm$ 0.029<br>(0.62 $\pm$ 0.01) |
| IV                                                                                    | 0.219 $\pm$ 0.029<br>(0.89 $\pm$ 0.01) | 0.219 $\pm$ 0.025<br>(0.89 $\pm$ 0.01) | 0.218 $\pm$ 0.049<br>(0.88 $\pm$ 0.01) | 0.367 $\pm$ 0.022<br>(0.66 $\pm$ 0.02) | 0.384 $\pm$ 0.020<br>(0.61 $\pm$ 0.03) | 0.356 $\pm$ 0.059<br>(0.58 $\pm$ 0.05) |
| V                                                                                     | 0.245 $\pm$ 0.033<br>(0.90 $\pm$ 0.01) | 0.219 $\pm$ 0.024<br>(0.89 $\pm$ 0.01) | 0.212 $\pm$ 0.047<br>(0.88 $\pm$ 0.02) | 0.357 $\pm$ 0.017<br>(0.66 $\pm$ 0.02) | 0.359 $\pm$ 0.023<br>(0.60 $\pm$ 0.05) | 0.378 $\pm$ 0.052<br>(0.56 $\pm$ 0.07) |
| VI                                                                                    | 0.258 $\pm$ 0.027<br>(0.89 $\pm$ 0.01) | 0.234 $\pm$ 0.016<br>(0.89 $\pm$ 0.01) | 0.247 $\pm$ 0.012<br>(0.88 $\pm$ 0.02) | 0.361 $\pm$ 0.031<br>(0.64 $\pm$ 0.02) | 0.337 $\pm$ 0.010<br>(0.60 $\pm$ 0.05) | 0.359 $\pm$ 0.051<br>(0.56 $\pm$ 0.05) |

3 Data are mean  $\pm$  SD.
